# Supplementary material for: Physical training attenuates systemic cytokine response and tissue damage triggered by apical periodontitis
Source: PubMed Central journal article supplement (PMC10997662; doi:10.1038/s41598-024-58384-1), 2024-04-05
Supplement: 41598_2024_58384_MOESM1_ESM.pdf [file 41598_2024_58384_MOESM1_ESM.pdf]

# Physical training attenuates systemic cytokine response and tissue damage triggered by apical periodontitis

Railson de Oliveira Ferreira<sup>1+</sup>, Matheus Soares Pereira<sup>1+</sup> Deiweson Souza-Monteiro<sup>1</sup>, Deborah Ribeiro Frazão<sup>1</sup>, João Daniel Mendonça de Moura<sup>1</sup>, Daiane Claydes Baia-da-Silva<sup>1</sup>, Leonardo Oliveira Bittencourt<sup>1</sup>, Gabriela de Souza Balbinot<sup>2</sup>, Fabrício Mezzomo Collares<sup>2</sup>, Maria Laura de Souza Lima<sup>3</sup>, Aurigena Antunes de Araújo<sup>3</sup>, and Rafael Rodrigues Lima<sup>1\*</sup>

<sup>1</sup> Laboratory of Functional and Structural Biology, Institute of Biological Sciences, Federal University of Pará, Belém, Pará, Brazil

<sup>2</sup> Dental Materials Laboratory, Department of Conservative Dentistry, School of Dentistry, Federal University of Rio Grande do Sul, Porto Alegre, Rio Grande do Sul, Brazil

<sup>3</sup> Department of Biophysics and Pharmacology, Federal University of Rio Grande do Norte, Natal, Rio Grande do Norte, Brazil

\* [rafalima@ufpa.br](mailto:rafalima@ufpa.br)

†these authors contributed equally to this work

**Table S1.** Description of all analysis values of the study.

| Analysis                       | Description of unit | Mean (Control) | SD (Control) | SEM (Control) | Mean (Physical Training) | SD (Physical Training) | SEM (Physical Training) | Mean (Apical Periodontitis) | SD (Apical Periodontitis) | SEM (Apical Periodontitis) | Mean (Apical Periodontitis + Physical Training) | SD (Apical Periodontitis + Physical Training) | SEM (Apical Periodontitis + Physical Training) |
|--------------------------------|---------------------|----------------|--------------|---------------|--------------------------|------------------------|-------------------------|-----------------------------|---------------------------|----------------------------|-------------------------------------------------|-----------------------------------------------|------------------------------------------------|
| <b>IL-1<math>\beta</math></b>  | pg/mL               | 37.08          | 8.03         | 4.64          | 42.50                    | 1.25                   | 0.72                    | 47.80                       | 16.50                     | 9.52                       | 48.02                                           | 6.09                                          | 3.51                                           |
| <b>TNF-<math>\alpha</math></b> | pg/mL               | 210            | 5.000        | 2.887         | 206.7                    | 2.887                  | 1.667                   | 350.7                       | 68.79                     | 39.72                      | 238.3                                           | 22.55                                         | 13.02                                          |
| <b>IL-6</b>                    | pg/mL               | 73.33          | 18.93        | 10.93         | 111.7                    | 5.77                   | 3.33                    | 177.9                       | 29.38                     | 11.99                      | 128.3                                           | 29.10                                         | 11.88                                          |
| <b>IL-10</b>                   | pg/mL               | 160            | 5.00         | 2.88          | 157.2                    | 14.95                  | 8.63                    | 230.5                       | 55.56                     | 32.08                      | 161.7                                           | 5.77                                          | 3.33                                           |
| <b>Tb.Th</b>                   | mm                  | 4.97           | 1.15         | 0.34          | 4.85                     | 0.67                   | 0.20                    | 3.16                        | 0.57                      | 0.19                       | 2.88                                            | 0.46                                          | 0.14                                           |
| <b>Tb.Sp</b>                   | mm                  | 2.71           | 1.51         | 0.47          | 2.24                     | 0.27                   | 0.086                   | 7.61                        | 1.39                      | 0.49                       | 4.34                                            | 1.01                                          | 0.35                                           |
| <b>Tb.N</b>                    | 1/mm                | 0.19           | 0.026        | 0.009         | 0.16                     | 0.004                  | 0.01                    | 0.15                        | 0.02                      | 0.065                      | 0.16                                            | 0.01                                          | 0.034                                          |
| <b>BV/TV</b>                   | %                   | 82.23          | 4.79         | 2.39          | 80.30                    | 3.43                   | 1.53                    | 35.91                       | 8.02                      | 3.58                       | 55.82                                           | 11.02                                         | 4.92                                           |
| <b>Lesion volume</b>           | mm <sup>3</sup>     | 4.99           | 3.15         | 1.41          | 6.39                     | 3.40                   | 1.52                    | 26.27                       | 2.28                      | 1.02                       | 17.31                                           | 4.10                                          | 1.835                                          |

**Table S1:** Values of the experimental study: systemic inflammatory biomarkers evaluation (IL-1 $\beta$ : Interleukin-1 $\beta$ , TNF- $\alpha$ : Tumoral Necrosis Factor- $\alpha$ , IL-6: Interleukin-6, IL-10: Interleukin-10) and microtomographic analysis (Tb.Th: Trabecular thickness, Tb.Sp: Trabecular spacing, Tb.N: Trabecular number, BV/TV: ratio between bone volume and tissue volume and Lesion volume). Results are expressed as mean, SD: Standard deviation and SEM: Standard error of mean.
